# Supplementary material
Source: PubMed Central journal article supplement (PMC6677146)

**A** PKD1 Median Coverage

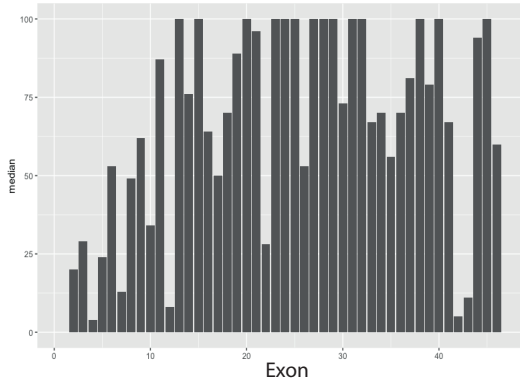

**B** PKD2 Median Coverage

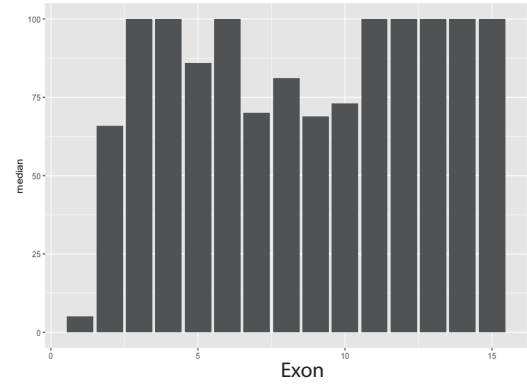

**C** PKD1 Proportion of bases covered >20 times

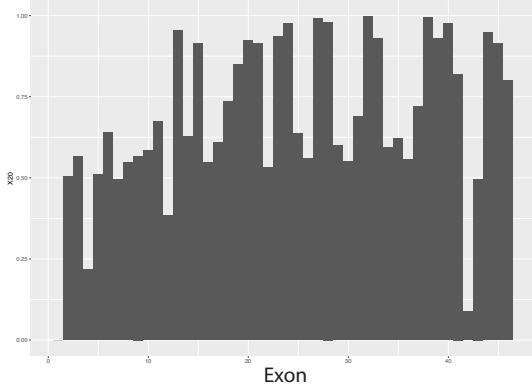

**D** PKD2 Proportion of bases covered >20 times

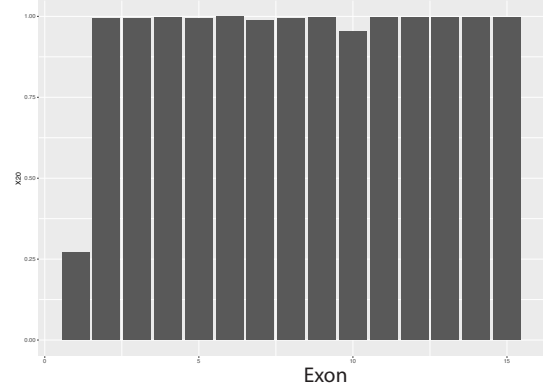

**E** PKD1 Proportion of bases covered >15 times

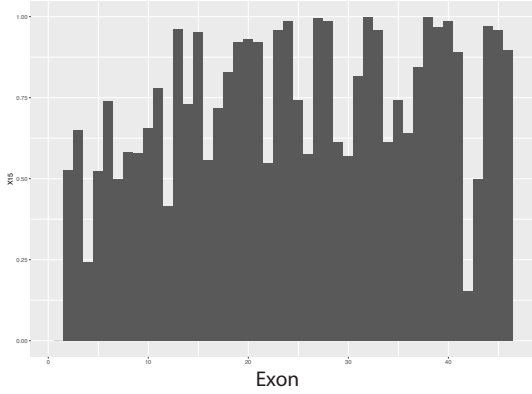

**F** PKD2 Proportion of bases covered >15 times

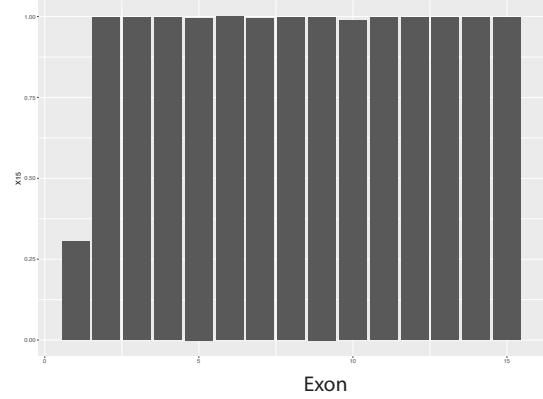

**G** PKD1 Proportion of bases covered >10 times

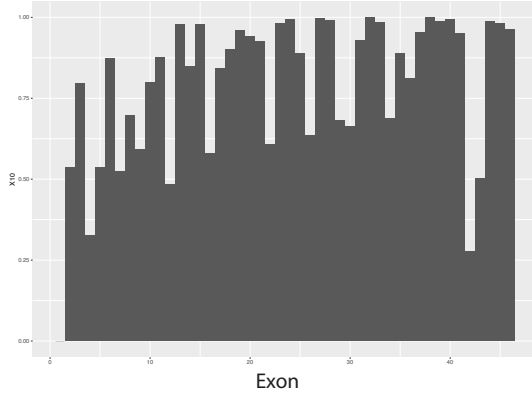

**H** PKD2 Proportion of bases covered >10 times

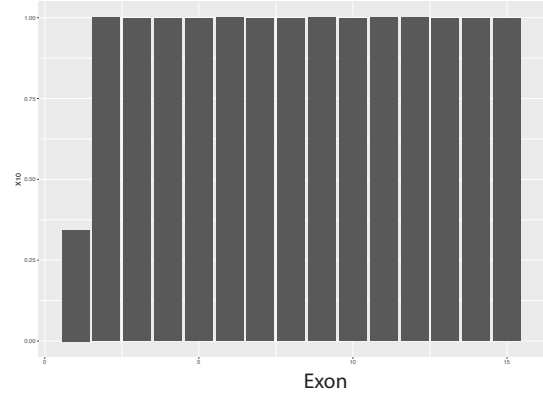

Supplement: NIHMS1030456-supplement-Sup_Fig_3.pdf [file NIHMS1030456-supplement-Sup_Fig_3.pdf]
