# Supplementary material
Source: PubMed Central journal article supplement (PMC6677146)

**A** Mapping Quality of PKD1 variants in ExAC

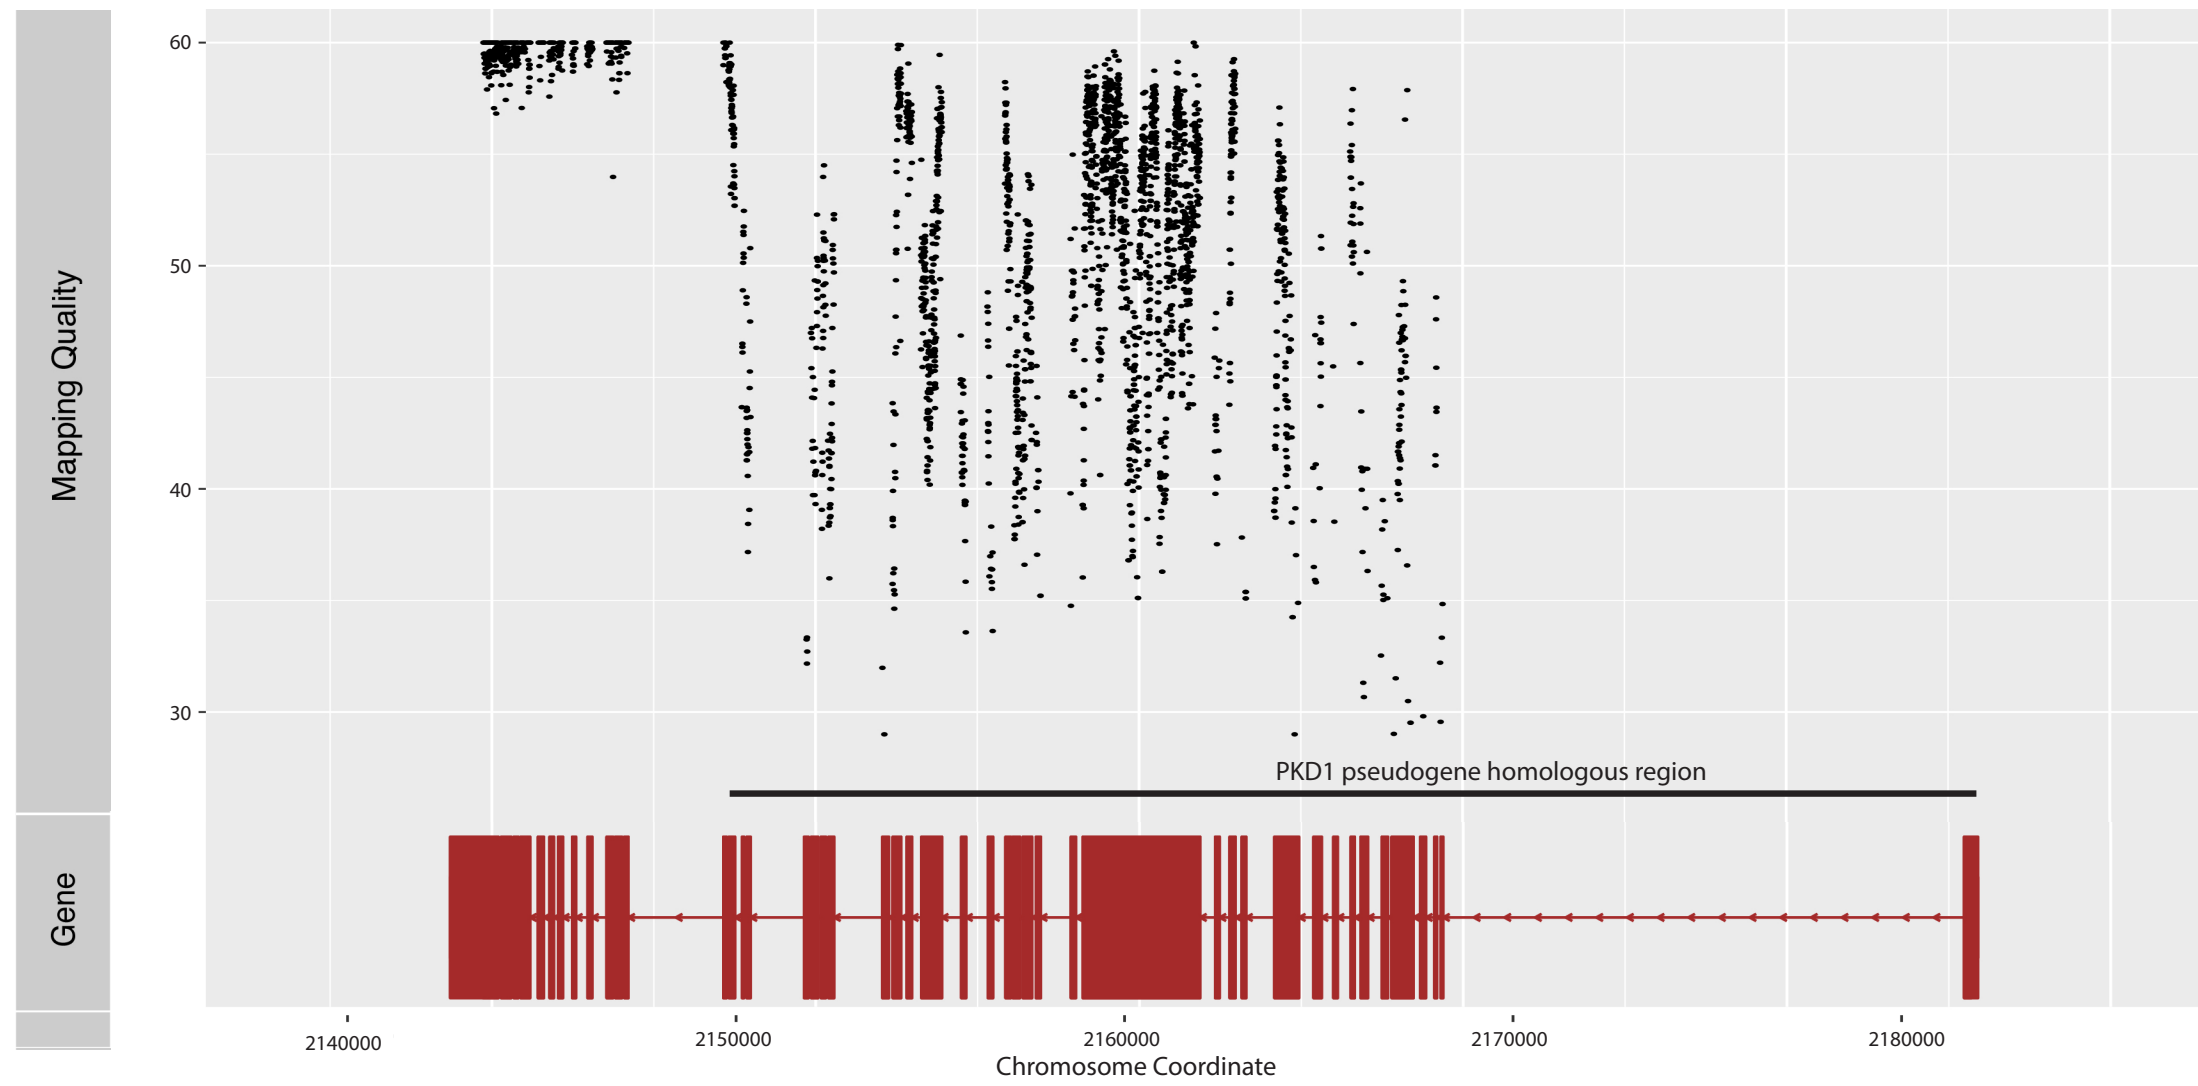

**B** PKD1 Coverage

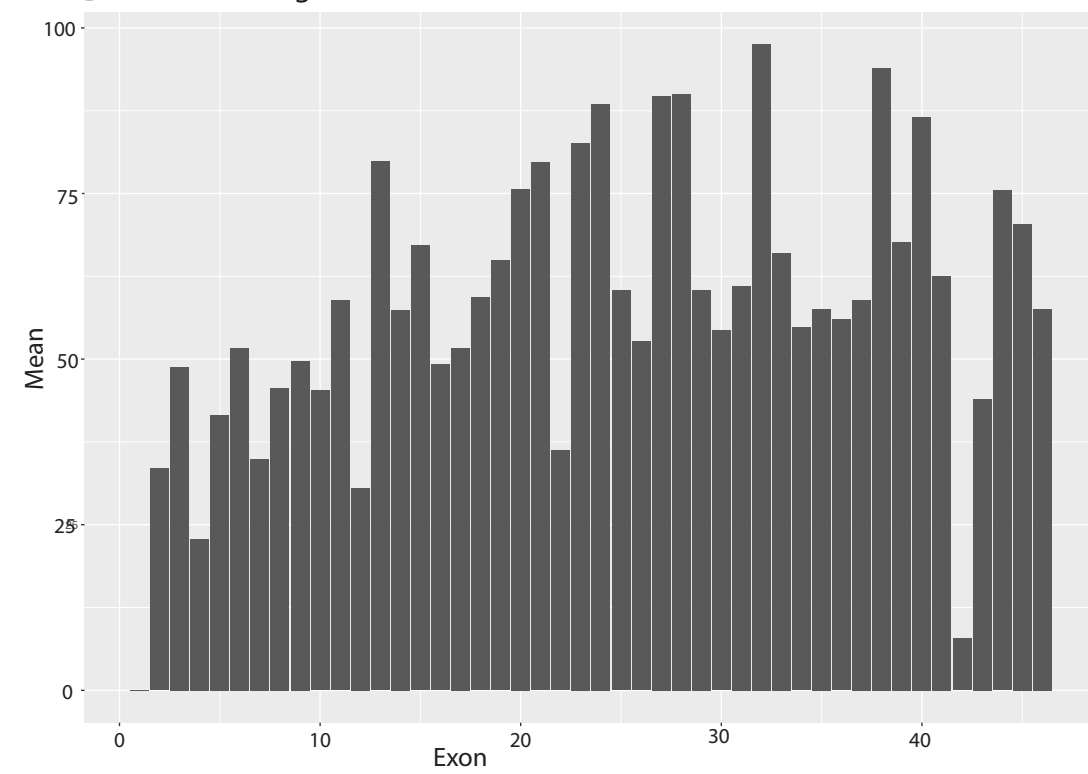

**C** PKD2 Coverage

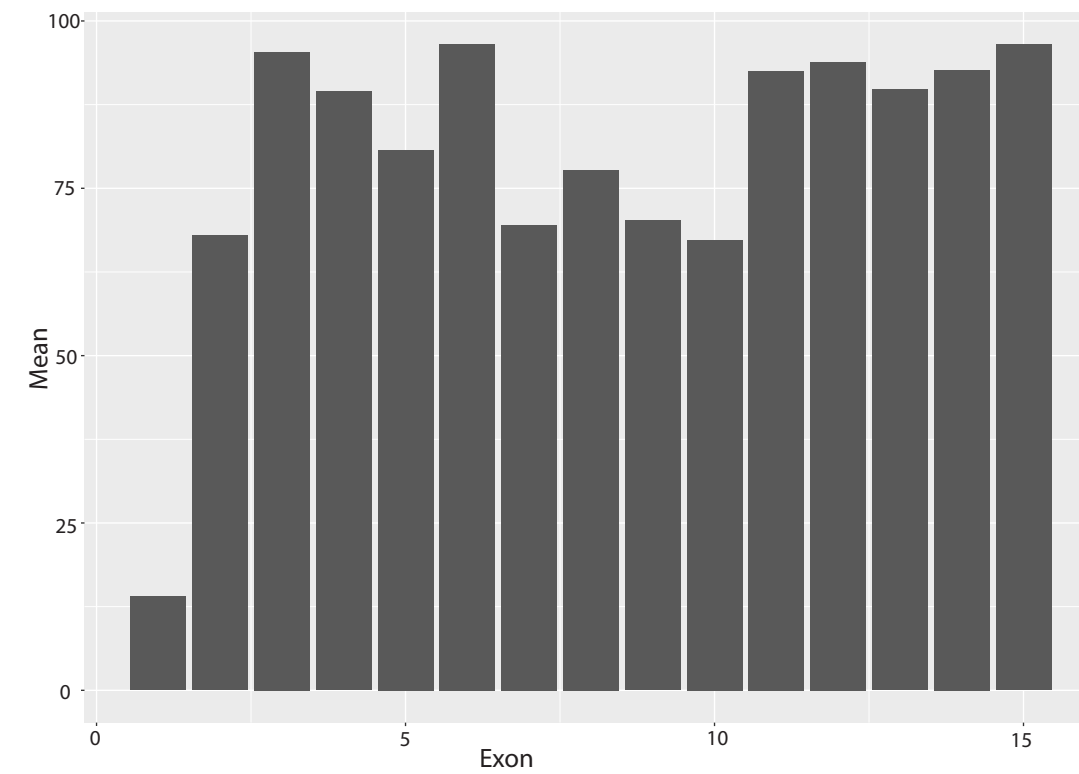

Supplement: NIHMS1030456-supplement-Sup_Fig_2.pdf [file NIHMS1030456-supplement-Sup_Fig_2.pdf]
